# Supplementary material for: MGME1 associates with poor prognosis and is vital for cell proliferation in lower-grade glioma
Source: Aging (Albany NY). 2023 May 8;15(9):3690–714. doi: 10.18632/aging.204705 (PMC10449294; doi:10.18632/aging.204705)
Supplement: Supplementary Tables 5-7 [file aging-15-204705-s006.pdf]

## SUPPLEMENTARY TABLES

**Supplementary Table 5. Clinical features of LGG patients from TCGA.**

| Clinical features |              | Total (477) | %       |
|-------------------|--------------|-------------|---------|
| Age               | Age ≤45      | 287         | 60.17%  |
|                   | Age >45      | 190         | 39.83 % |
| Gender            | Female       | 216         | 45.28%  |
|                   | Male         | 261         | 54.72%  |
| Grade             | WHO II       | 231         | 48.43%  |
|                   | WHO III      | 246         | 51.57%  |
| 1p/19q            | Non-codel    | 321         | 67.30%  |
|                   | Codel        | 156         | 32.70%  |
|                   | Mutant       | 389         | 81.55%  |
| IDH               | Wildtype     | 85          | 17.82%  |
|                   | Unknow       | 3           | 0.63%   |
| MGMT              | Unmethylated | 82          | 17.19%  |
|                   | Methylated   | 395         | 82.81%  |

**Supplementary Table 6. Clinical features of LGG patients from CGGA.**

| Clinical features |              | Total (170) | %      |
|-------------------|--------------|-------------|--------|
| Age               | Age ≤45      | 129         | 75.88% |
|                   | Age >45      | 41          | 24.12% |
| Gender            | Female       | 65          | 38.24% |
|                   | Male         | 105         | 61.76% |
| Grade             | WHO II       | 97          | 57.06% |
|                   | WHO III      | 73          | 42.94% |
| 1p/19q            | Non-codel    | 113         | 66.47% |
|                   | Codel        | 55          | 32.35% |
|                   | Unknow       | 2           | 1.18%  |
| IDH               | Mutant       | 125         | 73.53% |
|                   | Wildtype     | 44          | 25.88% |
|                   | Unknow       | 1           | 0.59%  |
| MGMT              | Unmethylated | 70          | 41.18% |
|                   | Methylated   | 84          | 49.41% |
|                   | Unknow       | 16          | 9.41%  |

**Supplementary Table 7. Clinical features of LGG patients from GSE16011.**

| Clinical features |           | Total (102) | %      |
|-------------------|-----------|-------------|--------|
| Age               | Age ≤45   | 57          | 55.88% |
|                   | Age >45   | 45          | 44.12% |
| Gender            | Female    | 35          | 34.31% |
|                   | Male      | 67          | 65.69% |
| Grade             | WHO II    | 22          | 21.57% |
|                   | WHO III   | 80          | 78.43% |
|                   | Non-codel | 35          | 34.31% |
| 1p/19q            | Codel     | 40          | 39.22% |
|                   | Unknow    | 27          | 26.47  |
|                   | Mutant    | 44          | 43.14% |
| IDH               | Wildtype  | 37          | 36.27% |
|                   | Unknow    | 21          | 20.59% |
